# Supplementary material for: Formal Syntax and Deep History
Source: PubMed Central journal article supplement (PMC7775603; doi:10.3389/fpsyg.2020.488871), 2020-12-18

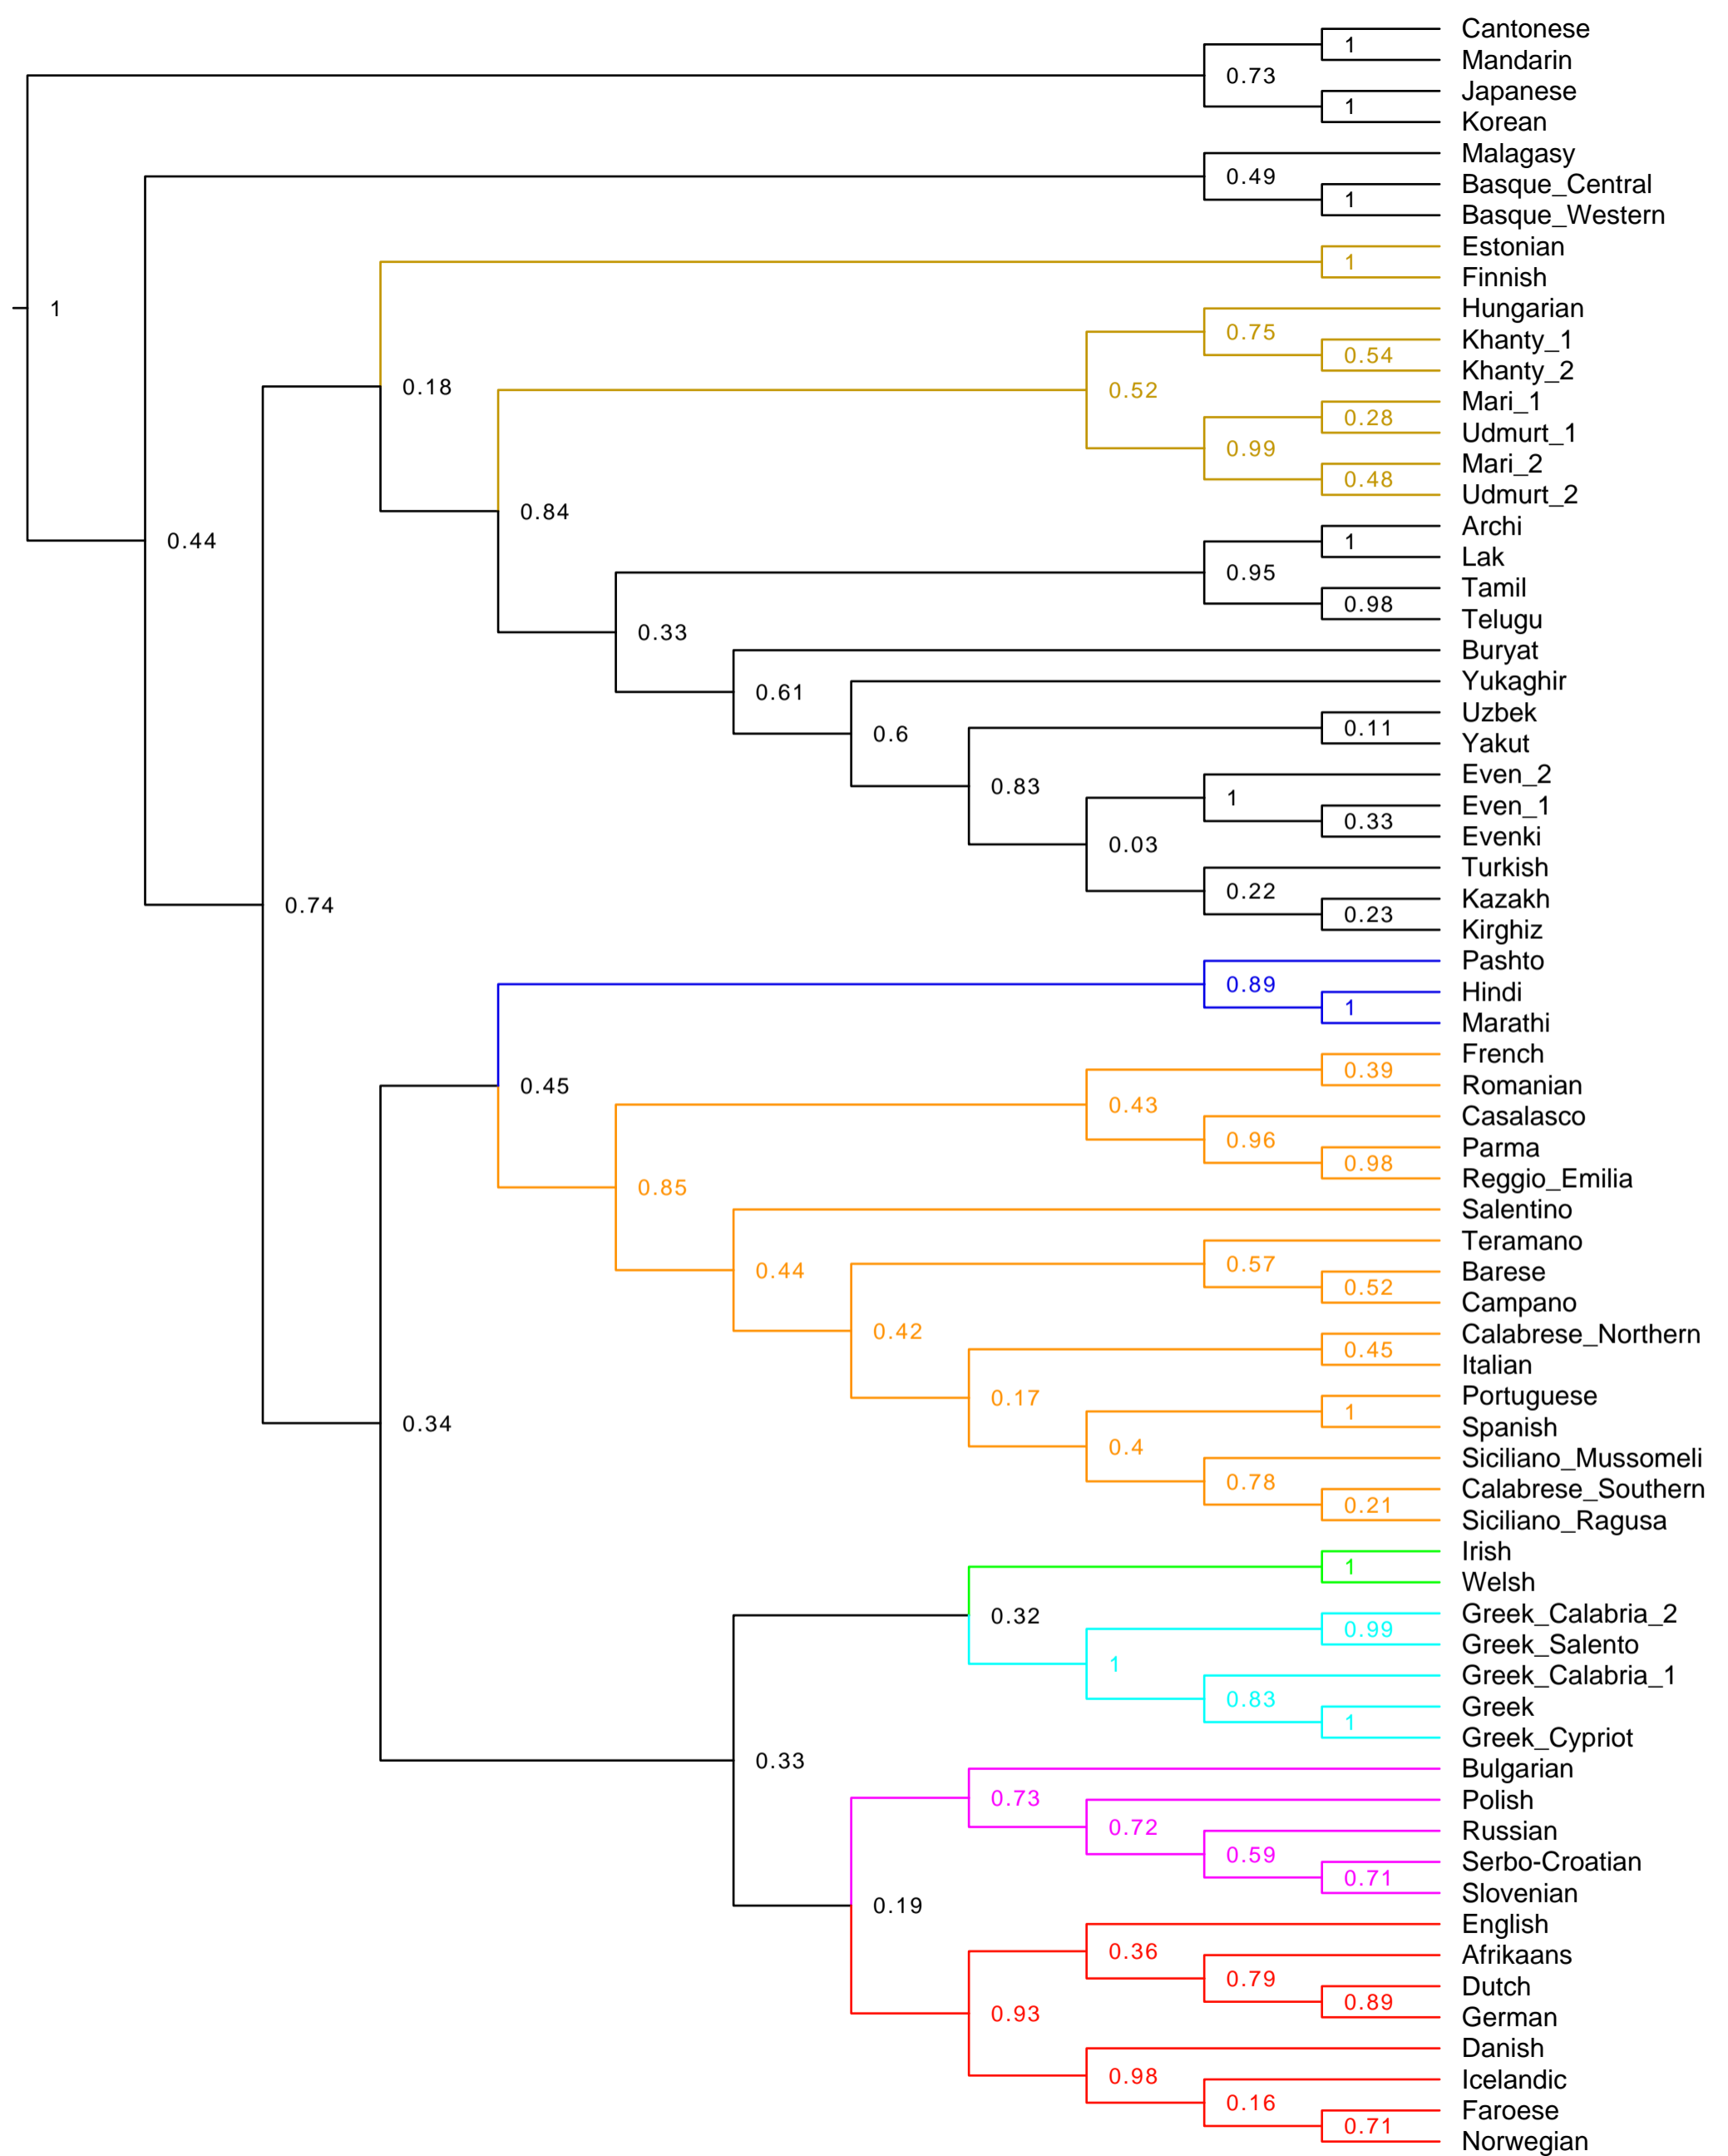

Supplement: Image_8.pdf [file Image_8.pdf]
