# Supplementary material for: Formal Syntax and Deep History
Source: PubMed Central journal article supplement (PMC7775603; doi:10.3389/fpsyg.2020.488871), 2020-12-18
Supplement: Image_9.pdf [file Image_9.pdf]

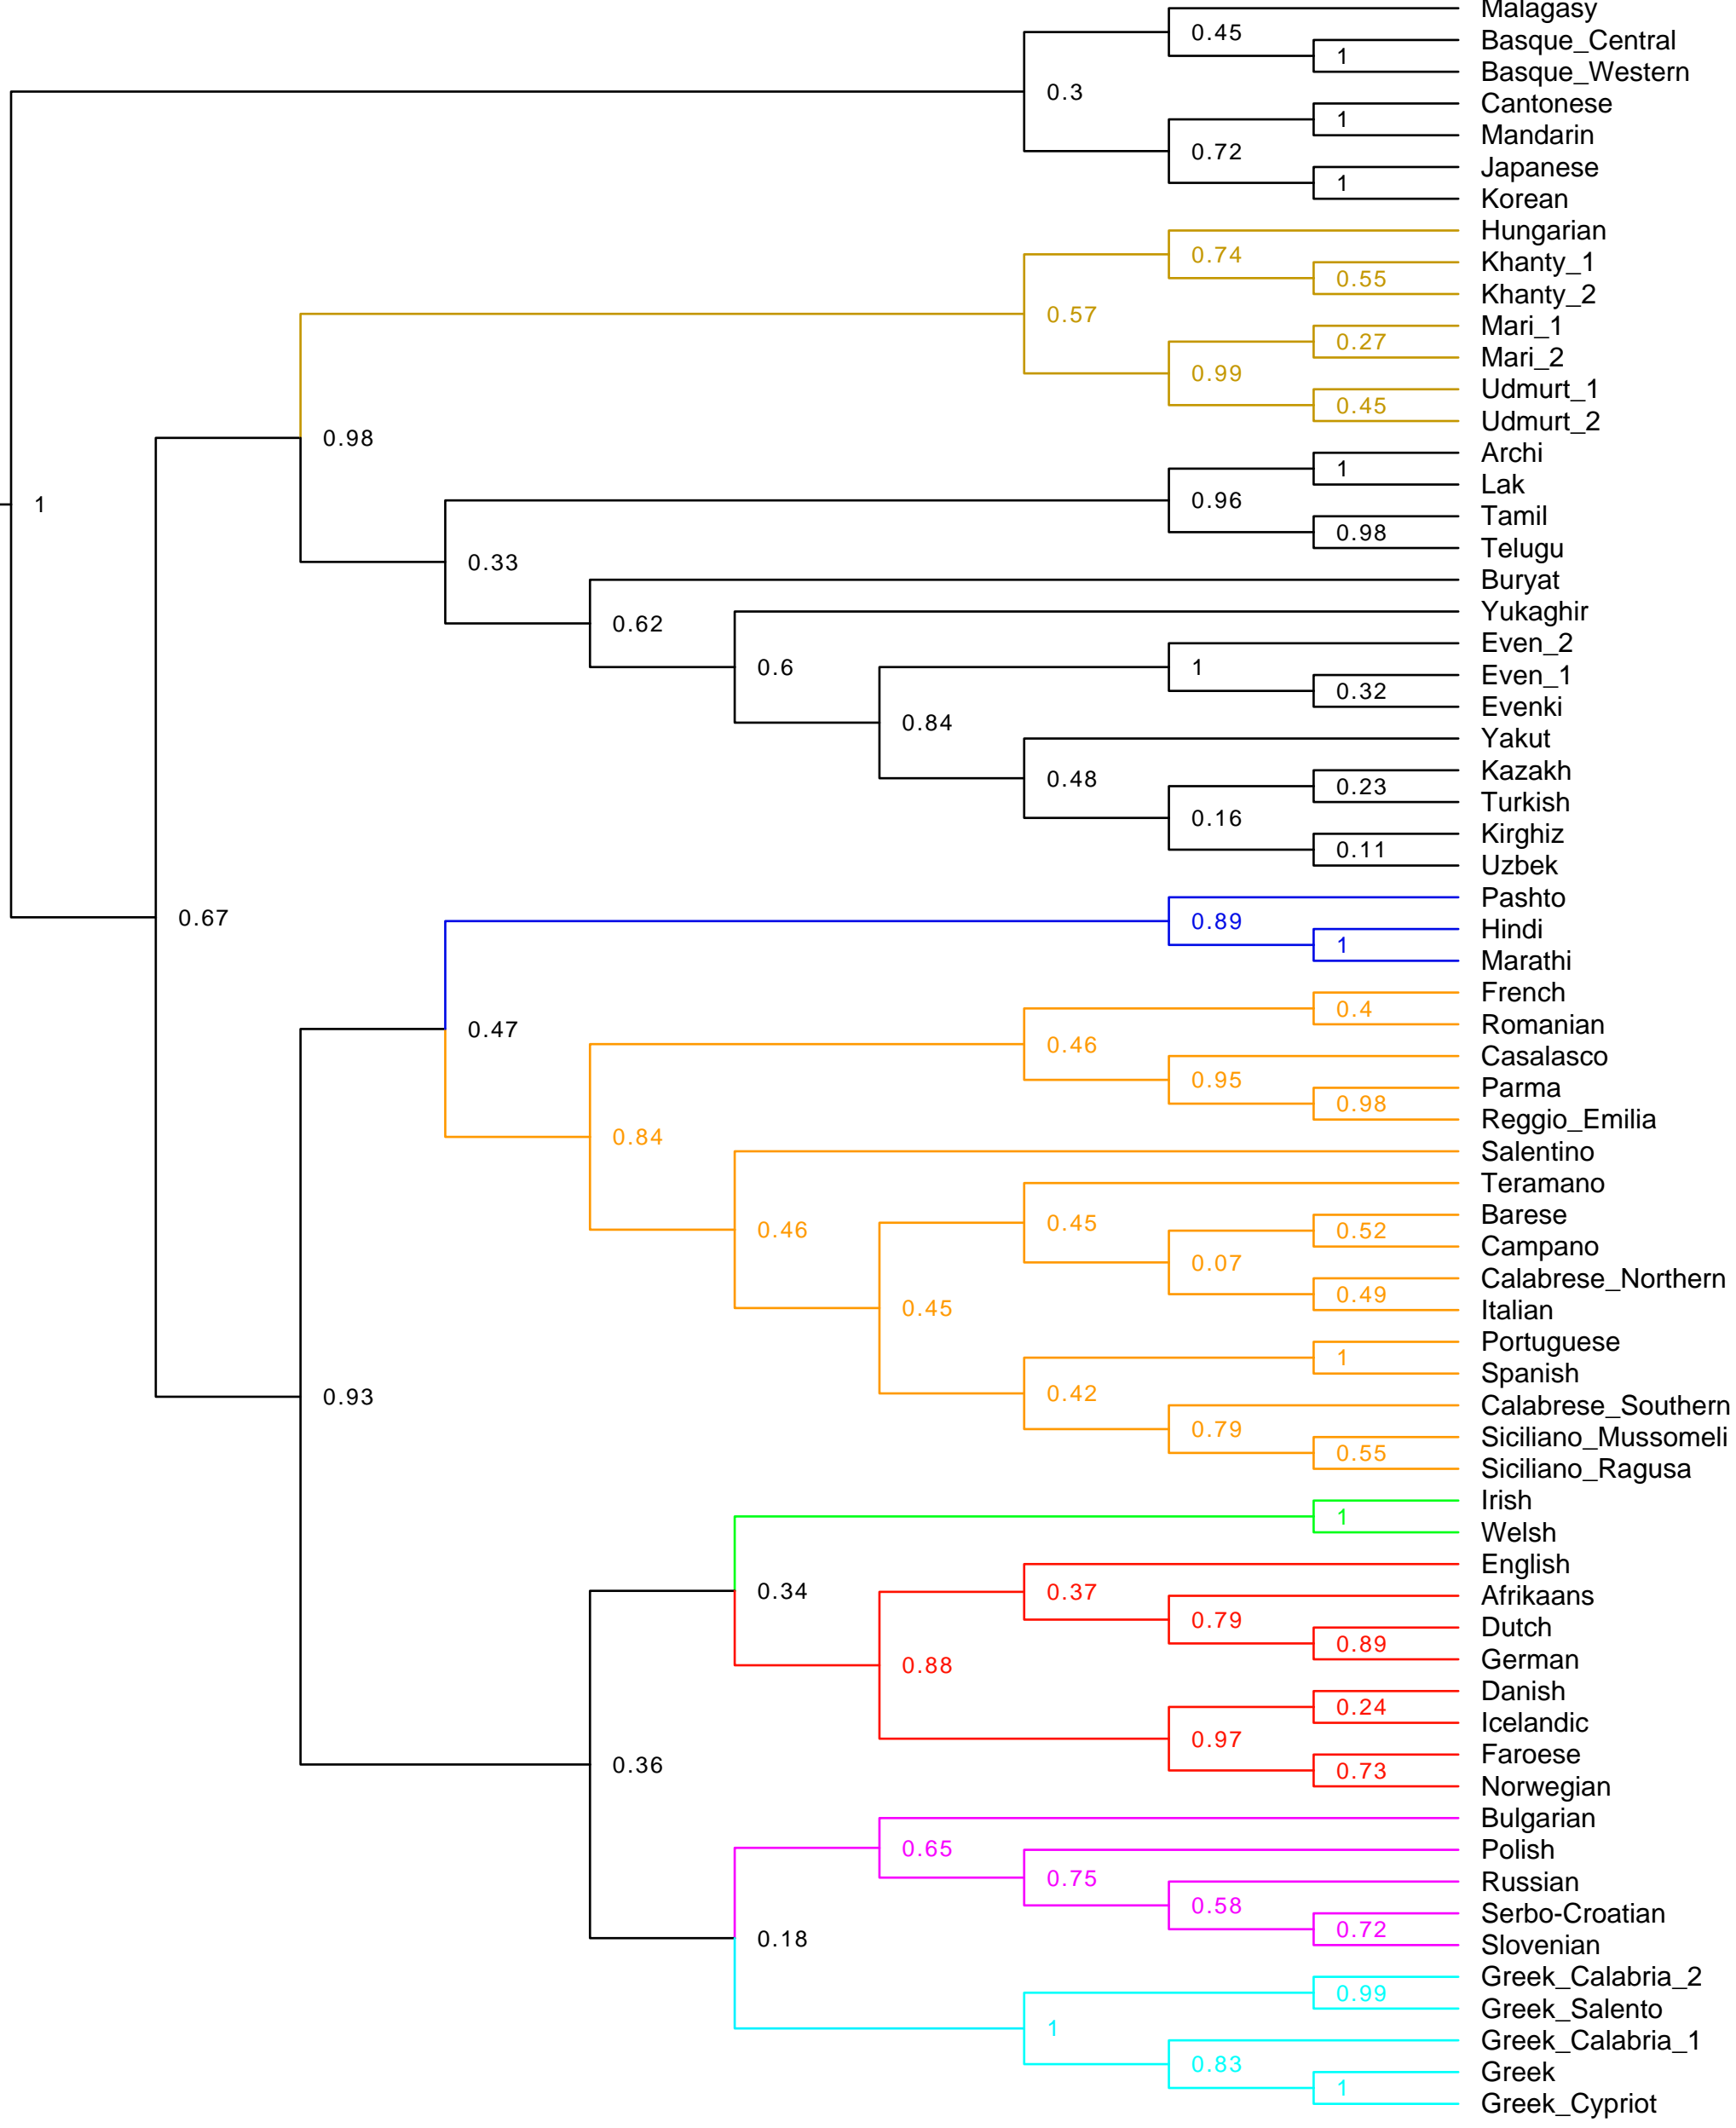

1.1

- Malagasy
- Basque\_Central
- Basque\_Western
- Cantonese
- Mandarin
- Japanese
- Korean
- Hungarian
- Khanty\_1
- Khanty\_2
- Mari\_1
- Mari\_2
- Udmurt\_1
- Udmurt\_2
- Archi
- Lak
- Tamil
- Telugu
- Buryat
- Yukaghir
- Even\_2
- Even\_1
- Evenki
- Yakut
- Kazakh
- Turkish
- Kirghiz
- Uzbek
- Pashto
- Hindi
- Marathi
- French
- Romanian
- Casalasco
- Parma
- Reggio\_Emia
- Salentino
- Teramano
- Barese
- Campano
- Calabrese\_Northern
- Italian
- Portuguese
- Spanish
- Calabrese\_Southern
- Siciliano\_Mussomeli
- Siciliano\_Ragusa
- Irish
- Welsh
- English
- Afrikaans
- Dutch
- German
- Danish
- Icelandic
- Faroese
- Norwegian
- Bulgarian
- Polish
- Russian
- Serbo-Croatian
- Slovenian
- Greek\_Calabria\_2
- Greek\_Salento
- Greek\_Calabria\_1
- Greek
- Greek\_Cypriot
