# Supplementary material for: Formal Syntax and Deep History
Source: Front Psychol. 2020 Dec 18;11:488871. doi: 10.3389/fpsyg.2020.488871 (PMC7775603; doi:10.3389/fpsyg.2020.488871)
Supplement: Supplementary file 18 [file Table_1.csv]

Language	Label	Glottocode	Iso 639-3 Code	Top-level family	Family	Location	Latitude	Longitude
Afrikaans	Afk	afri1274	afr	IE	Germanic	Cape Town	-33.91	18.42
Archi	Arc	arch1244	aqc	NE Caucasian	-	Machačkala	42.01	47.26
Barese	BA	pugl1238	nap	IE	Romance	Bari	41.11	16.87
Basque_Central	cB	guip1235	eus	Basque	Guipuzcoan	Vitoria-Gasteiz	42.85	-2.68
Basque_Western	wB	bisc1236	eus	Basque	Biskayan	Bilbao	43.26	-2.93
Bulgarian	Blg	bulg1262	bul	IE	Slavic	Sofia	42.7	23.32
Buryat	Bur	buri1258	bua	Mongolic	E Mongolic	Ulan-Ude	51.82	107.61
Calabrese_Northern	NCA	sout3126	nap	IE	Romance	Verbicaro	39.75	15.19
Calabrese_Southern	SCA	sout2616	scn	IE	Romance	Reggio Calabria	38.11	15.66
Campano	Cam	napo1241	nap	IE	Romance	S. Maria Capua Vetere	41.08	14.25
Cantonese	Can	cant1236	yue	Sino-Tibetan	Sinitic	Hong Kong	22.4	114.11
Casalasco	CR	west2342	egl	IE	Romance	Casalmaggiore	44.98	10.42
Danish	Da	dani1285	dan	IE	Germanic	Copenhagen	55.68	12.57
Dutch	Du	dutc1256	nld	IE	Germanic	Amsterdam	52.37	4.89
English	E	stan1293	eng	IE	Germanic	London	51.51	-0.13
Estonian	Est	esto1258	ekk	Uralic	Finno-Ugric	Tallinn	59.44	24.75
Even_1	Ev1	even1260	eve	Tungusic	N Tungusic	Kustur	67.79	130.4
Even_2	Ev2	even1260	eve	Tungusic	N Tungusic	Sebyan-Kyuyol	65.29	130.01
Evenki	Ek	even1259	evn	Tungusic	NW Tungusic	Bomnak	54.71	128.86
Faroese	FO	faro1244	fao	IE	Germanic	Tórshavn	62.01	-6.77
Finnish	Fin	finn1318	fin	Uralic	Finno-Ugric	Helsinki	60.17	24.94
French	Fr	stan1290	fra	IE	Romance	Paris	48.86	2.35
German	D	stan1295	deu	IE	Germanic	Berlin	52.52	13.4
Greek	Grk	mode1248	ell	IE	Greek	Athens	37.98	23.73
Greek_Calabria_1	CG1	aspr1238	ell	IE	Greek	Bova	37.99	15.92
Greek_Calabria_2	CG2	aspr1238	ell	IE	Greek	Bova Marina	37.93	15.55
Greek_Cypriot	CyG	cypr1249	ell	IE	Greek	Larnaca	34.09	33.62
Greek_Salento	SaG	apul1237	ell	IE	Greek	Calimera	40.24	18.27
Hindi	Hi	hind1269	hin	IE	Indo-Aryan	New Delhi	28.61	77.21
Hungarian	Hu	hung1274	hun	Uralic	Finno-Ugric	Budapest	47.5	19.04
Icelandic	Ice	icel1247	isl	IE	Germanic	Reykjavik	64.14	-21.94
Irish	Ir	iris1253	gle	IE	Celtic	Dublin	53.35	-6.26
Italian	It	ital1282	ita	IE	Romance	Rome	41.9	12.5
Japanese	Jap	nucl1643	jpn	Japonic	-	Tokyo	35.69	139.69
Kazakh	Kaz	kaza1248	kaz	Turkic	Kipchak	Almaty	43.22	76.85
Khanty_1	Kh1	khan1279	kca	Uralic	Finno-Ugric	Kazym	63.7	67.24
Khanty_2	Kh2	khan1279	kca	Uralic	Finno-Ugric	Kazym	63.7	67.24
Korean	Kor	kore1280	kor	Koreanic	-	Seul	37.57	126.98
Kirghiz	Kyr	kirg1245	kir	Turkic	Kipchak	Bishkek	42.87	74.57
Lak	Lak	lakk1252	lbe	NE Caucasian	-	Kumukh	42.54	47.89
Malagasy	Mal	plat1254	plt	Austronesian	Malayo-Polinesian	Antananarivo	18.88	47.51
Mandarin	Man	mand1415	cmn	Sino-Tibetan	Sinitic	Beijing	39.9	116.41
Marathi	Ma	mara1378	mar	IE	Indo-Aryan	Mumbai	19.08	72.88
Mari_1	mM1	mari1278	chm	Uralic	Mari	Shap	56.44	47.96
Mari_2	mM2	mari1278	chm	Uralic	Mari	Shap	56.44	47.96
Norwegian	Nor	norw1258	nor	IE	Germanic	Oslo	59.91	10.75
Parma	PR	cent1959	egl	IE	Romance	Parma	44.8	10.32
Pashto	Pas	pash1269	pus	IE	Iranian	Khyber Pass	34.09	71.16
Polish	Po	poli1260	pol	IE	Slavic	Warsaw	52.23	21.01
Portuguese	Ptg	port1283	por	IE	Romance	Lisbon	38.72	-9.1
Reggio_Emilia	RE	cent1959	egl	IE	Romance	Reggio Emilia	44.7	10.63
Romanian	Rm	roma1327	ron	IE	Romance	Bucharest	44.43	26.1
Russian	Rus	russ1263	rus	IE	Slavic	Moscow	55.76	37.62
Salentino	Sal	pugl1238	scn	IE	Romance	Cellino San Marco	40.47	17.96
Serbo-Croatian	SC	sout1528	hbs	IE	Slavic	Zagreb	45.82	15.98
Siciliano_Mussomeli	MsS	cent1963	scn	IE	Romance	Mussomeli	37.57	13.75
Siciliano_Ragusa	RGS	sout2617	scn	IE	Romance	Ragusa	36.92	14.72
Slovenian	Slo	slov1268	slv	IE	Slavic	Ljubljana	46.06	14.51
Spanish	Sp	stan1288	spa	IE	Romance	Madrid	40.42	-3.7
Tamil	Ta	tami1289	tam	Dravidian	-	Madras	13.08	80.27
Telugu	Te	telu1262	tel	Dravidian	-	Hyderabad	17.39	78.49
Teramano	Ter	neap1235	nap	IE	Romance	Teramo	42.66	13.7
Turkish	Tur	nucl1301	tur	Turkic	Oghuz	Ankara	39.93	32.86
Udmurt_1	Ud1	udmu1245	udm	Uralic	Permian	Chur	57.07	53.03
Udmurt_2	Ud2	udmu1245	udm	Uralic	Permian	Chur	57.07	53.03
Uzbek	Uz	uzbe1247	uzb	Turkic	Turkestan Turkic	Tashkent	41.3	69.24
Welsh	Wel	wels1247	cym	IE	Celtic	Cardiff	51.48	-3.18
Yakut	Ya	yaku1245	sah	Turkic	N Siberian Turkic	Jakutsk	62.04	129.68
Yukaghir	Yu	yuka1259	yux	Yukaghir	Kolmic (S Yukaghir)	Kolyma	65.5	151.09
